# Supplementary material
Source: publisher site journal article supplement (https://www.spandidos-publications.com/7461/downloadSupplementary)
Supplement: Supplementary file 1 [file downloadSupplementary]

## Sheet: Sheet1
Table SII. The concentration and quality of the isolated RNA evaluated using a NanoDrop 2000c spectrophotometer.
GC specimens		A260/A280	A260/A230	Concentration (ng/ul)
1	N	2.07	2.13	1891
	T	2.07	2.15	838.2
2	N	2.07	2.15	1536.5
	T	2.08	2.20	924.9
3	N	2.04	2.06	245
	T	2.06	2.16	1177
4	N	2.06	2.05	1199.3
	T	2.07	2.19	1480.9
5	N	2.07	2.15	1480.4
	T	2.08	2.20	1247.7
6	N	2.04	1.89	615.1
	T	2.06	2.19	1209.6
7	N	2.01	1.84	288
	T	1.99	1.93	487.9
8	N	2.04	2.10	1190.4
	T	2.04	2.15	1183.7
9	N	2.14	2.4	194
	T	2.04	2.13	314.8
10	N	2.05	2.17	1254.9
	T	2.06	2.15	1622
11	N	2.02	1.95	1137.6
	T	2.01	1.95	313.9
